# Supplementary material
Source: MDPI journal article supplement (https://www.mdpi.com/2073-4441/14/13/2116)
Supplement: s1 [file s1]

## Support Information

Table S1. Mean values ( $\pm$  Standard deviation) of the physical-chemical parameters measured in the three lakes sampled.

|               | pH              | Conductivity<br>( $\mu$ S/cm) | Concentration<br>O <sub>2</sub> (mg/L) | Temperature<br>(°C) | Salinity<br>(‰) | Nitrite<br>(mg/L) | Nitrate<br>(mg/L) | Ammonia<br>(mg/L) | Phosphate<br>(mg/L) | Silicate<br>(mg/L) |
|---------------|-----------------|-------------------------------|----------------------------------------|---------------------|-----------------|-------------------|-------------------|-------------------|---------------------|--------------------|
| <b>Lake 1</b> | 7.23 $\pm$ 0.15 | 267 $\pm$ 4.04                | 8.08 $\pm$ 0.51                        | 10.5 $\pm$ 0.40     | 0.15 $\pm$ 0.02 | 0.2 $\pm$ 0.00    | 11.67 $\pm$ 0.26  | 0.43 $\pm$ 0.02   | 0.34 $\pm$ 0.00     | 2.21 $\pm$ 0.01    |
| <b>Lake 2</b> | 6.82 $\pm$ 0.14 | 360 $\pm$ 4.04                | 3.99 $\pm$ 0.69                        | 11.2 $\pm$ 0.10     | 0.22 $\pm$ 0.01 | 0.2 $\pm$ 0.00    | 6.79 $\pm$ 0.26   | 1.68 $\pm$ 0.01   | 0.08 $\pm$ 0.01     | 1.74 $\pm$ 0.01    |
| <b>Lake 3</b> | 7.33 $\pm$ 0.06 | 352 $\pm$ 1.00                | 9.84 $\pm$ 1.11                        | 11.0 $\pm$ 0.32     | 0.22 $\pm$ 0.01 | 0.2 $\pm$ 0.00    | 9.30 $\pm$ 0.00   | 0.98 $\pm$ 0.00   | 0.13 $\pm$ 0.01     | 1.67 $\pm$ 0.01    |

Table S2. Diatom valve counts and valve percentage found in the three lakes of Oporto's City Park. Species with the abundance superior to 1% in at least one lake are highlighted.

| Species                                                                     | Valve count |        |        |       | Valve percentage (%) |        |        |       |
|-----------------------------------------------------------------------------|-------------|--------|--------|-------|----------------------|--------|--------|-------|
|                                                                             | Lake 1      | Lake 2 | Lake 3 | Total | Lake1                | Lake 2 | Lake 3 | Total |
| <i>Achnantheidium exiguum</i> (Grunow) Czarnecki 1994                       | 0           | 2      | 6      | 8     | 0.0                  | 0.5    | 1.5    | 0.6   |
| <i>Achnantheidium minutissimum</i> (Kützing) Czarnecki 1994                 | 4           | 105    | 10     | 119   | 1.0                  | 24.6   | 2.5    | 9.6   |
| <i>Achnantheidium saprophilum</i> Kützing 1844                              | 0           | 0      | 6      | 6     | 0.0                  | 0.0    | 1.5    | 0.5   |
| <i>Achnantheidium subhudsonis</i> (Hustedt) H.Kobayasi 2006                 | 2           | 0      | 1      | 3     | 0.5                  | 0.0    | 0.2    | 0.2   |
| <i>Amphora minutissima</i> W.Smith 1853                                     | 0           | 0      | 2      | 2     | 0.0                  | 0.0    | 0.5    | 0.2   |
| <i>Amphora ovalis</i> (Kützing) Kützing 1844                                | 0           | 4      | 0      | 4     | 0.0                  | 0.9    | 0.0    | 0.3   |
| <i>Amphora pediculus</i> (Kützing) Grunow 1875                              | 6           | 8      | 96     | 110   | 1.5                  | 1.9    | 23.5   | 8.9   |
| <i>Amphora veneta</i> Kützing 1844                                          | 0           | 0      | 5      | 5     | 0.0                  | 0.0    | 1.2    | 0.4   |
| <i>Cocconeis placentula</i> var. <i>euglypta</i> (Ehrenberg) Grunow 1884    | 2           | 0      | 0      | 2     | 0.5                  | 0.0    | 0.0    | 0.2   |
| <i>Cocconeis placentula</i> var. <i>lineata</i> (Ehrenberg) Van Heurck 1885 | 0           | 2      | 0      | 2     | 0.0                  | 0.5    | 0.0    | 0.2   |
| <i>Ctenophora pulchella</i> (Ralfs ex Kützing) D.M.Williams & Round 1986    | 0           | 22     | 6      | 28    | 0.0                  | 5.2    | 1.5    | 2.3   |
| <i>Cyclotella meneghiniana</i> Kützing 1844                                 | 0           | 2      | 3      | 5     | 0.0                  | 0.5    | 0.7    | 0.4   |

|                                                                                          |     |    |    |     |      |     |     |      |
|------------------------------------------------------------------------------------------|-----|----|----|-----|------|-----|-----|------|
| <i>Cyclotella stelligera</i> (Cleve & Grunow) Van Heurck 1882                            | 0   | 0  | 27 | 27  | 0.0  | 0.0 | 6.6 | 2.2  |
| <i>Cymbella tumida</i> (Brébisson) Van Heurck 1880                                       | 0   | 9  | 0  | 9   | 0.0  | 2.1 | 0.0 | 0.7  |
| <i>Eolimna minima</i> (Grunow) Lange-Bertalot in Moser & al. 1998                        | 4   | 0  | 21 | 25  | 1.0  | 0.0 | 5.1 | 2.0  |
| <i>Fragilaria pararumpens</i> Lange-Bertalot, G.Hofmann & Werum, 2013                    | 65  | 4  | 24 | 93  | 15.9 | 0.9 | 5.9 | 7.5  |
| <i>Fragilaria parva</i> (Grunow) A.Tuji & D.M.Williams 2008                              | 2   | 0  | 4  | 6   | 0.5  | 0.0 | 1.0 | 0.5  |
| <i>Fragilaria vaucheriae</i> (Kützing) J.B.Petersen 1938                                 | 0   | 0  | 20 | 20  | 0.0  | 0.0 | 4.9 | 1.6  |
| <i>Gomphonema acuminatum</i> Ehrenberg 1832                                              | 0   | 0  | 4  | 4   | 0.0  | 0.0 | 1.0 | 0.3  |
| <i>Gomphonema affine</i> Kützing 1844                                                    | 4   | 7  | 0  | 11  | 1.0  | 1.6 | 0.0 | 0.9  |
| <i>Gomphonema clavatum</i> Ehrenberg 1832                                                | 2   | 0  | 2  | 4   | 0.5  | 0.0 | 0.5 | 0.3  |
| <i>Gomphonema exilissimum</i> (Grunow) Lange-Bertalot & E.Reichardt 1996                 | 9   | 0  | 0  | 9   | 2.2  | 0.0 | 0.0 | 0.7  |
| <i>Gomphonema gracile</i> Ehrenberg 1838                                                 | 0   | 0  | 2  | 2   | 0.0  | 0.0 | 0.5 | 0.2  |
| <i>Gomphonema lagenula</i> Kützing 1844                                                  | 31  | 0  | 0  | 31  | 7.6  | 0.0 | 0.0 | 2.5  |
| <i>Gomphonema olivaceum</i> (Hornemann) Ehrenberg 1838                                   | 0   | 4  | 0  | 4   | 0.0  | 0.9 | 0.0 | 0.3  |
| <i>Gomphonema parvulum</i> (Kützing) Kützing 1849                                        | 128 | 6  | 6  | 140 | 31.4 | 1.4 | 1.5 | 11.3 |
| <i>Luticola goeppertiana</i> (Bleisch) D.G.Mann ex J.Rarick, S.Wu, S.S.Lee & Edlund 2017 | 0   | 4  | 0  | 4   | 0.0  | 0.9 | 0.0 | 0.3  |
| <i>Mayamaea permitis</i> (Hustedt) K.Bruder & Medlin 2008                                | 1   | 1  | 0  | 2   | 0.2  | 0.2 | 0.0 | 0.2  |
| <i>Melosira varians</i> C.Agardh 1827                                                    | 89  | 23 | 7  | 119 | 21.8 | 5.4 | 1.7 | 9.6  |
| <i>Navicula cryptocephala</i> Kützing 1844                                               | 21  | 2  | 7  | 30  | 5.1  | 0.5 | 1.7 | 2.4  |
| <i>Navicula cryptotenella</i> Lange-Bertalot 1985                                        | 5   | 1  | 0  | 6   | 1.2  | 0.2 | 0.0 | 0.5  |
| <i>Navicula gregaria</i> Donkin 1861                                                     | 12  | 6  | 24 | 42  | 2.9  | 1.4 | 5.9 | 3.4  |
| <i>Navicula radiosa</i> Kützing 1844                                                     | 0   | 0  | 2  | 2   | 0.0  | 0.0 | 0.5 | 0.2  |
| <i>Navicula veneta</i> Kützing 1844                                                      | 0   | 0  | 21 | 21  | 0.0  | 0.0 | 5.1 | 1.7  |
| <i>Nitzschia amphibia</i> Grunow 1862                                                    | 0   | 16 | 14 | 30  | 0.0  | 3.8 | 3.4 | 2.4  |
| <i>Nitzschia capitellata</i> Hustedt, 1922                                               | 6   | 0  | 2  | 8   | 1.5  | 0.0 | 0.5 | 0.6  |
| <i>Nitzschia communis</i> Rabenhorst 1860                                                | 0   | 4  | 0  | 4   | 0.0  | 0.9 | 0.0 | 0.3  |
| <i>Nitzschia fonticola</i> (Grunow) Grunow 1881                                          | 0   | 13 | 0  | 13  | 0.0  | 3.1 | 0.0 | 1.0  |

|                                                                          |     |     |     |      |       |       |       |       |
|--------------------------------------------------------------------------|-----|-----|-----|------|-------|-------|-------|-------|
| <i>Nitzschia inconspicua</i> Grunow 1862                                 | 1   | 6   | 10  | 17   | 0.2   | 1.4   | 2.5   | 1.4   |
| <i>Nitzschia palea</i> (Kützing) W.Smith 1856                            | 14  | 29  | 8   | 51   | 3.4   | 6.8   | 2.0   | 4.1   |
| <i>Pinnularia microstauron</i> (Ehrenberg) Cleve 1891                    | 0   | 0   | 2   | 2    | 0.0   | 0.0   | 0.5   | 0.2   |
| <i>Planothidium frequentissimum</i> (Lange-Bertalot) Lange-Bertalot 1999 | 0   | 1   | 12  | 13   | 0.0   | 0.2   | 2.9   | 1.0   |
| <i>Pseudostaurosira brevistriata</i> (Grunow) D.M.Williams & Round 1988  | 0   | 4   | 12  | 16   | 0.0   | 0.9   | 2.9   | 1.3   |
| <i>Tabularia tabulata</i> (C.Agardh) Snoeijs 1992                        | 0   | 123 | 40  | 163  | 0.0   | 28.9  | 9.8   | 13.1  |
| <i>Ulnaria ulna</i> (Nitzsch) Compère 2001                               | 0   | 18  | 2   | 20   | 0.0   | 4.2   | 0.5   | 1.6   |
| Total                                                                    | 408 | 426 | 408 | 1242 | 100.0 | 100.0 | 100.0 | 100.0 |

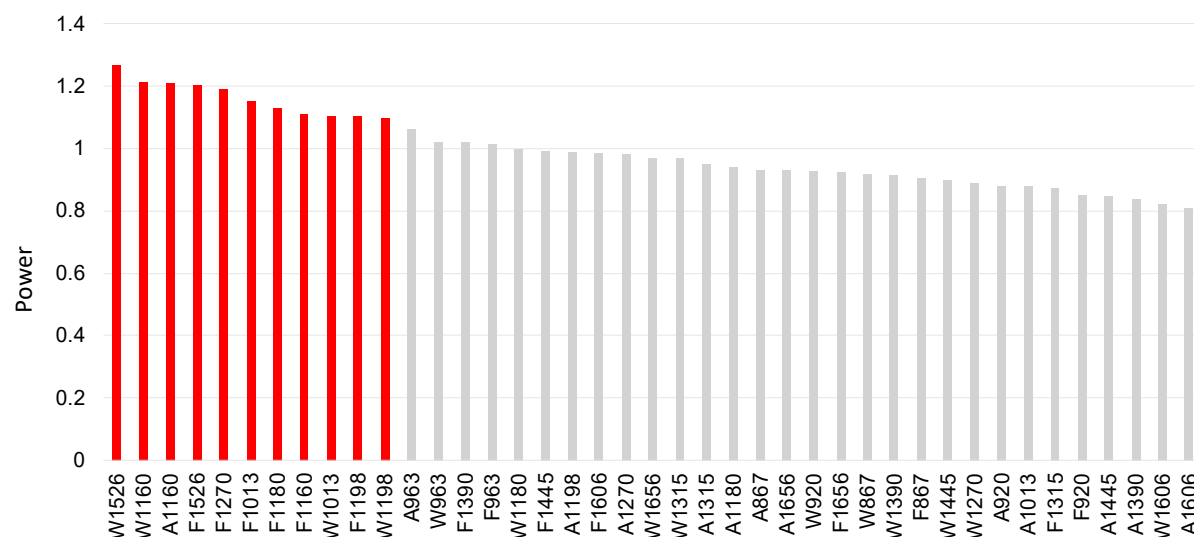

Figure S1. Graphical representation of the most important Raman variables in explaining the variance in the components according to PLS results. The most important variables are highlighted in red: Width (W) of the bands 1526, 1160, 1013 and 1198  $\text{cm}^{-1}$ , Area (A) of the band 1160  $\text{cm}^{-1}$  and Frequency (F) of the bands 1526, 1270, 1013, 1180, 1160 and 1198  $\text{cm}^{-1}$ .
